# Supplementary material
Source: publisher figshare collection journal article supplement (https://geolsoc.figshare.com/articles/dataset/_/3454493)
Supplement: Supplementary file 1 [file 1]

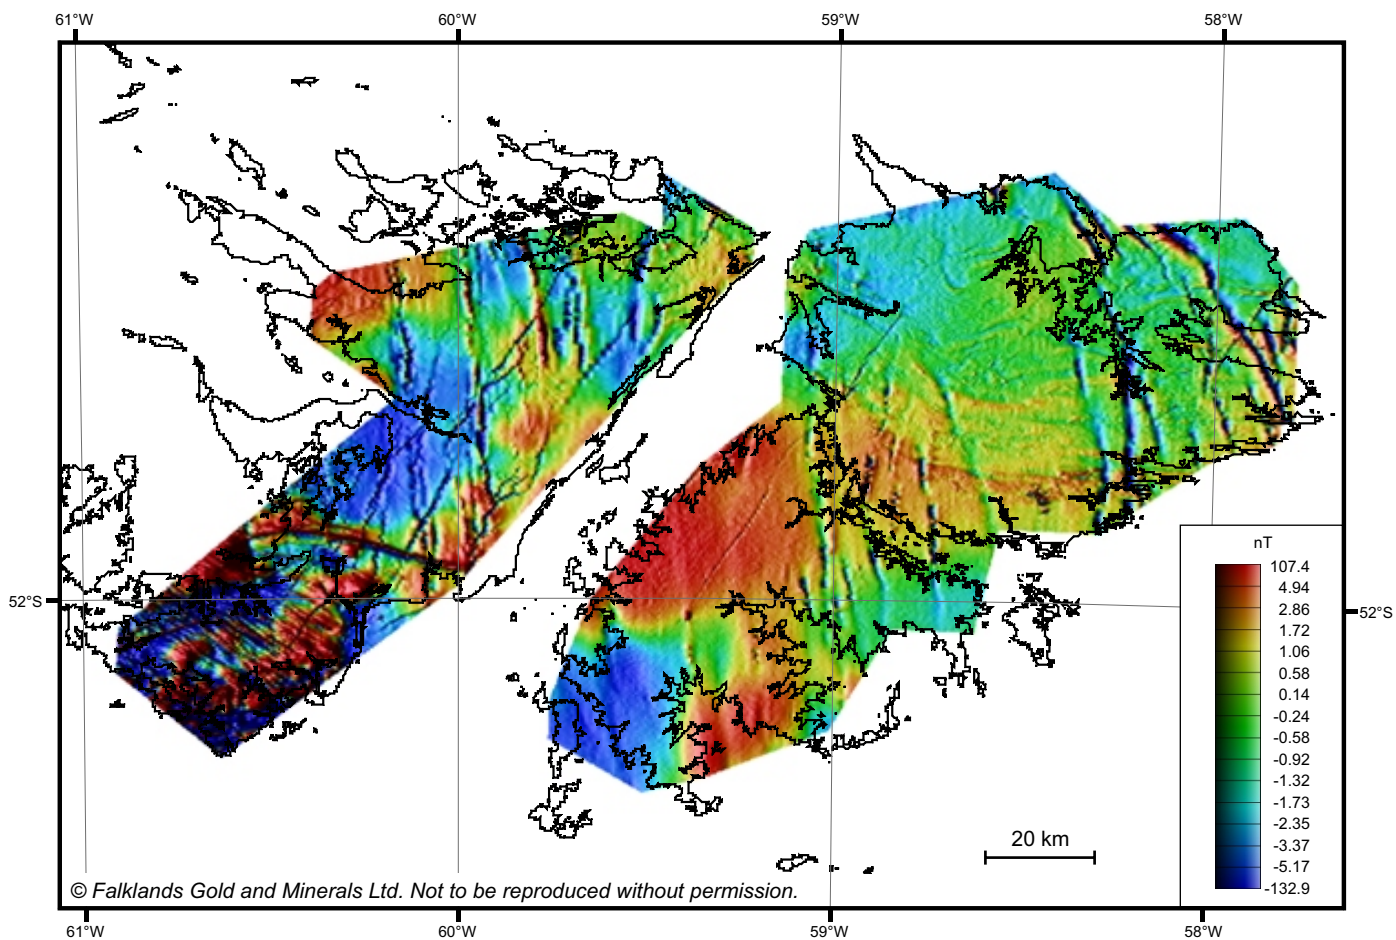

Aeromagnetic image of the Falkland Islands, based on a residual field calculated by subtracting a 0.5 km upward continuation from the total magnetic field. Colour shaded-relief image with equal colour area and illumination from the west. The survey comprised N-S flight lines at a typical spacing of 0.5 km and E-W tie lines at a spacing of 5 km; the flying height was 120 m above terrain. A variety of alternative transformations were employed when picking the anomalies shown in Fig. 1 of the main paper, and inspection of individual profiles was used to confirm the anomaly polarity.
